# Supplementary material for: Chemoselective reduction of aldehydes by ruthenium trichloride and resin-bound formates
Source: publisher site journal article supplement (doi:10.3762/bjoc.4.53), 2008-12-19
Supplement: Additional file 2 [file 1860-5397-4-53-S2.pdf]

**Supporting Information for**

**Chemoselective reduction of aldehydes by ruthenium trichloride and resin-bound formates**

Basudeb Basu\*, Bablee Mandal, Sajal Das, Pralay Das and Ashis K. Nanda

Address: Department of Chemistry, University of North Bengal, Darjeeling 734 013,

India.

Email: Basudeb Basu\* - basu\_nbu@hotmail.com

**Spectral data of some selected alcohols**

**Table 2, Entry 3: (4-Isopropylphenyl)methanol [1]**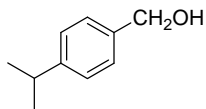

IR (neat)  $\nu_{\max}$ : 3334, 2960, 2871, 1514, 1215  $\text{cm}^{-1}$ .  $^1\text{H}$  NMR ( $\text{CDCl}_3$ , 400 MHz)  $\delta$  = 7.29 (2H, d,  $J$  = 8.0 Hz), 7.23 (2H, d,  $J$  = 8.0 Hz), 4.65 (2H, s), 2.90 (1H, septet,  $J$  = 6.9 Hz), 1.66 (1H, br s), 1.25 (6H, d,  $J$  = 6.9 Hz).  $^{13}\text{C}$  NMR ( $\text{CDCl}_3$ , 100 MHz)  $\delta$  = 147.5, 137.3, 126.2, 125.6, 64.3, 32.9, 22.9. HRMS: Calcd for  $\text{C}_{10}\text{H}_{14}\text{ONa}$ :  $[\text{M}+\text{Na}]^+$ , 173.0943; found: 173.0946.

**Table 2, Entry 5: (3-Methoxyphenyl)methanol [2]**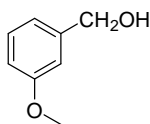

IR (neat)  $\nu_{\max}$ : 3332, 2912, 2837, 1587, 1265  $\text{cm}^{-1}$ .  $^1\text{H}$  NMR ( $\text{CDCl}_3$ , 300 MHz)  $\delta$  = 7.25 (1H, t,  $J$  = 7.5 Hz), 6.92–6.81 (3H, m), 4.62 (2H, s), 3.79 (3H, s), 2.41 (1H, br s).  $^{13}\text{C}$  NMR ( $\text{CDCl}_3$ , 75 MHz)  $\delta$  = 159.7, 142.5, 129.5, 119.0, 113.1, 112.2, 65.0, 55.1.

**Table 2, Entry 6: (2-Chlorophenyl)methanol [3]**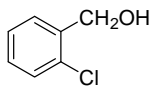

mp = 73–74 °C (Lit. 74 °C). IR (Nujol)  $\nu_{\max}$ : 3201, 2854, 1458, 1034  $\text{cm}^{-1}$ .  $^1\text{H}$  NMR ( $\text{CDCl}_3$ , 300 MHz)  $\delta$  = 7.46 (1H, dd,  $J$  = 7.5 & 2.1 Hz), 7.35 (1H, dd,  $J$  = 7.2 & 1.8 Hz), 7.28 (1H, ddd,  $J$  = 7.5, 7.2 & 1.8 Hz), 7.23 (1H, ddd,  $J$  = 7.2, 7.2 & 2.1 Hz), 4.75 (2H, s), 2.31 (1H, s).  $^{13}\text{C}$  NMR ( $\text{CDCl}_3$ , 75 MHz)  $\delta$  = 138.1, 132.6, 129.3, 128.8, 128.6, 127.0, 62.7.

**Table 2, Entry 8: (3-Nitrophenyl)methanol [4]**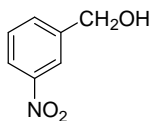

IR (neat)  $\nu_{\max}$ : 3360, 2874, 1528, 1350, 1046  $\text{cm}^{-1}$ .  $^1\text{H}$  NMR ( $\text{CDCl}_3$ , 300 MHz)  $\delta$  = 8.18 (1H, s), 8.08 (1H, dd,  $J$  = 7.8 & 1.8 Hz), 7.64 (1H, d,  $J$  = 7.5 Hz), 7.47 (1H, t,  $J$  = 7.8 Hz), 4.76 (2H, s), 2.19 (1H, br s).  $^{13}\text{C}$  NMR ( $\text{CDCl}_3$ , 75 MHz)  $\delta$  = 148.3, 142.8, 132.6, 129.4, 122.4, 121.4, 63.9.

**Table 2, Entry 9: (2-Nitrophenyl)methanol [5]**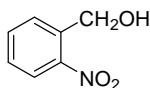

IR (neat)  $\nu_{\max}$ : 3364, 2877, 1532, 1349, 1047  $\text{cm}^{-1}$ .  $^1\text{H}$  NMR ( $\text{CDCl}_3$ , 300 MHz)  $\delta$  = 8.09 (1H, d,  $J$  = 8.1 Hz), 7.74 (1H, d,  $J$  = 7.5 Hz), 7.67 (1H, dd,  $J$  = 8.1 & 7.8 Hz), 7.47 (1H, dd,  $J$  = 7.8 & 7.6 Hz), 4.97 (2H, s), 2.61 (1H, br s).  $^{13}\text{C}$  NMR ( $\text{CDCl}_3$ , 75 MHz)  $\delta$  = 136.8, 134.2, 129.9, 128.5, 125.0, 62.5.

**Table 2, Entry 10: (3,5-Dibromophenyl)methanol [6]**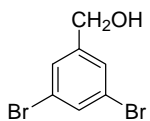

mp = 98 °C. IR (Nujol)  $\nu_{\max}$ : 3309, 2925, 2854, 1556, 1033  $\text{cm}^{-1}$ .  $^1\text{H}$  NMR ( $\text{CDCl}_3$ , 400 MHz)  $\delta$  = 7.56 (1H, s), 7.42 (2H, s), 4.62 (2H, s), 2.15 (1H, s).  $^{13}\text{C}$  NMR ( $\text{CDCl}_3$ , 100 MHz)  $\delta$  = 144.6, 133.0, 128.4, 123.0, 63.6.

**Table 2, Entry 11: (4-Fluorophenyl)methanol [7]**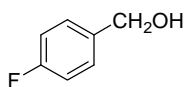

IR (neat)  $\nu_{\max}$ : 3332, 2879, 1514, 1417, 1222  $\text{cm}^{-1}$ .  $^1\text{H}$  NMR ( $\text{CDCl}_3$ , 300 MHz)  $\delta$  = 7.31–7.23 (2H, m), 7.05–6.96 (2H, m), 4.58 (2H, s), 2.50 (1H, s).  $^{13}\text{C}$  NMR ( $\text{CDCl}_3$ , 75 MHz)  $\delta$  = 163.9, 160.6, 136.6, 136.5, 128.8, 128.7, 115.5, 115.2, 64.4.

**Table 2, Entry 12: (3-Phenoxyphenyl)methanol**

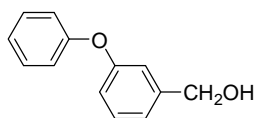

IR (neat)  $\nu_{\max}$ : 3319, 3039, 2871, 1583, 1446, 1215  $\text{cm}^{-1}$ .  $^1\text{H}$  NMR ( $\text{CDCl}_3$ , 400 MHz)  $\delta$  = 7.36–7.29 (3H, m), 7.13–7.07 (2H, m), 7.02–7.00 (3H, m), 6.94–6.91 (1H, m), 4.62 (2H, s), 2.20 (1H, br s).  $^{13}\text{C}$  NMR ( $\text{CDCl}_3$ , 100 MHz)  $\delta$  = 157.4, 156.9, 142.9, 129.7, 129.6, 123.2, 121.5, 118.9, 117.7, 116.3, 64.5. HRMS: Calcd for  $\text{C}_{13}\text{H}_{12}\text{O}_2\text{Na}$ :  $[\text{M}+\text{Na}]^+$ , 223.0735; found: 223.0739.

**Table 2, Entry 13: [4-(Benzyloxy)phenyl]methanol**

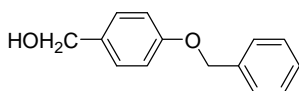

mp = 90 °C. IR (neat)  $\nu_{\max}$ : 3379, 2923, 2856, 1508, 1456, 1244  $\text{cm}^{-1}$ .  $^1\text{H}$  NMR ( $\text{CDCl}_3$ , 400 MHz)  $\delta$  = 7.34–7.27 (7H, m), 6.97–6.95 (2H, m), 5.07 (2H, s), 4.60 (2H, s).  $^{13}\text{C}$  NMR ( $\text{CDCl}_3$ , 75 MHz)  $\delta$  = 158.3, 136.9, 133.4, 128.6, 127.9, 127.4, 114.9, 70.0, 64.8. HRMS: Calcd for  $\text{C}_{14}\text{H}_{14}\text{O}_2\text{Na}$ :  $[\text{M}+\text{Na}]^+$ , 237.0892; found: 237.0899.

**Table 2, Entry 14: 2-Phenylpropan-1-ol**

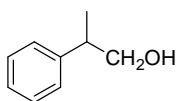

IR (neat)  $\nu_{\max}$ : 3350, 3010, 2950, 1600, 1500  $\text{cm}^{-1}$ .  $^1\text{H}$  NMR ( $\text{CDCl}_3$ , 400 MHz)  $\delta$  = 7.38–7.34 (2H, m), 7.28–7.24 (3H, m), 3.73 (2H, s), 2.97 (1H, q,  $J$  = 6.96 Hz), 1.31 (3H, d,  $J$  = 7.08 Hz).  $^{13}\text{C}$  NMR ( $\text{CDCl}_3$ , 75 MHz)  $\delta$  = 143.8, 128.6, 127.5, 126.7, 68.7, 42.4, 17.6. HRMS: Calcd for  $\text{C}_9\text{H}_{12}\text{ONa}$ :  $[\text{M}+\text{Na}]^+$ , 159.0786; found: 159.0789.

**Table 2, Entry 16: (Pyridin-4-yl)methanol [8]**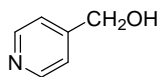

mp = 58 °C (Lit. 57–60 °C). IR (Nujol)  $\nu_{\max}$ : 3125, 2854, 1605, 1042  $\text{cm}^{-1}$ .  $^1\text{H}$  NMR ( $\text{CDCl}_3$ , 300 MHz)  $\delta$  = 8.33 (2H, dd,  $J$  = 4.5 & 1.8 Hz), 7.21 (2H, dd,  $J$  = 4.5 & 1.8 Hz), 4.64 (2H, s), 4.20 (1H, br s).  $^{13}\text{C}$  NMR ( $\text{CDCl}_3$ , 75 MHz)  $\delta$  = 151.5, 149.0, 121.3, 62.8.

**Table 2, Entry 17: (5-bromothiophen-2-yl)methanol [9]**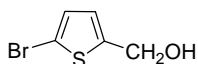

IR (neat)  $\nu_{\max}$ : 3321, 2927, 2869, 1014  $\text{cm}^{-1}$ .  $^1\text{H}$  NMR ( $\text{CDCl}_3$ , 400 MHz)  $\delta$  = 6.90 (1H, d,  $J$  = 3.68 Hz), 6.72 (1H, d,  $J$  = 3.64 Hz), 4.69 (2H, s), 2.42 (1H, br s).  $^{13}\text{C}$  NMR ( $\text{CDCl}_3$ , 100 MHz)  $\delta$  = 145.7, 129.6, 125.6, 112.2, 60.0.

**References**

1. Van Tamelen, E. E.; Gladysz, J. A. *J. Am. Chem. Soc.* **1974**, *96*, 5290–5291.  
doi:[10.1021/ja00823a065](https://doi.org/10.1021/ja00823a065)
2. Moiseev, D. V.; James, B. R.; Hu, T. Q. *Inorg. Chem.* **2006**, *45*, 10338–10346.  
doi:[10.1021/ic0613560](https://doi.org/10.1021/ic0613560)
3. Lane, C. F.; Myatt, H. L.; Daniels, J.; Hopps, H. B. *J. Org. Chem.* **1974**, *39*, 3052–3054. doi:[10.1021/jo00934a028](https://doi.org/10.1021/jo00934a028)
4. Thorp, L.; Wildman, E. A. *J. Am. Chem. Soc.* **1915**, *37*, 372–377.  
doi:[10.1021/ja02271a013](https://doi.org/10.1021/ja02271a013)
5. Raghuvanshi, R. S.; Singh, K. N. *Synth. Commun.* **2007**, *37*, 1371–1374.  
doi:[10.1080/00397910701228604](https://doi.org/10.1080/00397910701228604)
6. El Bakkari, M.; Vincent, J.-M. *Org. Lett.* **2004**, *6*, 2765–2767.  
doi:[10.1021/ol048994b](https://doi.org/10.1021/ol048994b)

7. Kabalka, G. W.; Malladi, R. R. *Chem. Commun.* **2000**, 2191.  
doi:[10.1039/b007190k](https://doi.org/10.1039/b007190k)
8. Boekelheide, V.; Linn, W. J. *J. Am. Chem. Soc.* **1954**, 76, 1286–1291.  
doi:[10.1021/ja01634a026](https://doi.org/10.1021/ja01634a026)
9. Vu, T.-T.-H.; Kumbhar, P. S.; Figueras, F. *Adv. Synth. Catal.* **2003**, 345, 493–496. doi:[10.1002/adsc.200390056](https://doi.org/10.1002/adsc.200390056)
